# Supplementary material for: Evaluation of serum lipid, lipoprotein, and apolipoprotein levels in psoriatic patients: a systematic review and meta-analysis of case-control studies
Source: PubMed Central journal article supplement — Postepy Dermatol Alergol. 2019 Dec 30;36(6):692–702. doi: 10.5114/ada.2019.91420 (PMC6986295; doi:10.5114/ada.2019.91420), 2019-12-30

**Supplementary Table S2.** Quality ratings for the studies included on the basis of Newcastle-Ottawa quality assessment scale ( $n = 49$ )

| The first author, year      | Selection (score) | Comparability (score) | Exposure/outcome (score) | Total score |
|-----------------------------|-------------------|-----------------------|--------------------------|-------------|
| Aguilar Martinez, 1989 [10] | 1                 | 0                     | 2                        | 3           |
| Seckin, 1994 [16]           | 3                 | 2                     | 2                        | 7           |
| Seishima, 1994 [50]         | 2                 | 1                     | 2                        | 5           |
| Rocha-Pereira, 2001 [57]    | 2                 | 1                     | 2                        | 5           |
| Takeda, 2001 [51]           | 2                 | 1                     | 2                        | 5           |
| Pietrzak, 2002 [43]         | 2                 | 2                     | 2                        | 6           |
| Uyanik, 2002 [17]           | 2                 | 0                     | 2                        | 4           |
| Piskin, 2003 [18]           | 2                 | 1                     | 2                        | 5           |
| Vanizor Kural, 2003 [19]    | 4                 | 1                     | 2                        | 7           |
| Pietrzak, 2006 [44]         | 2                 | 2                     | 2                        | 6           |
| Farshchian, 2007 [29]       | 3                 | 2                     | 2                        | 7           |
| Akhyani, 2007 [30]          | 3                 | 1                     | 2                        | 6           |
| Bajaj, 2009 [36]            | 3                 | 1                     | 2                        | 6           |
| Pietrzak, 2009 [45]         | 2                 | 1                     | 2                        | 5           |
| Toker, 2009 [20]            | 2                 | 2                     | 2                        | 6           |
| Aldhalimi, 2010 [58]        | 3                 | 2                     | 2                        | 7           |
| Azizzadeh, 2010 [31]        | 4                 | 1                     | 2                        | 7           |
| Swelam, 2010 [52]           | 2                 | 0                     | 2                        | 4           |
| Malekzad, 2011 [32]         | 4                 | 1                     | 2                        | 7           |
| Pereira, 2011 [37]          | 3                 | 1                     | 2                        | 6           |
| Usta, 2011 [21]             | 3                 | 1                     | 2                        | 6           |
| Asefi, 2012 [33]            | 3                 | 1                     | 2                        | 6           |
| Ferretti, 2012 [55]         | 3                 | 1                     | 2                        | 6           |
| Mehta, 2012 [47]            | 4                 | 1                     | 2                        | 7           |
| Romani, 2012 [2]            | 2                 | 2                     | 2                        | 6           |
| Cao, 2013 [48]              | 3                 | 1                     | 2                        | 6           |
| Emre, 2013 [22]             | 3                 | 1                     | 2                        | 6           |
| Nemati, 2013 [11]           | 3                 | 1                     | 2                        | 6           |
| Taheri Sarvtin, 2013 [34]   | 2                 | 2                     | 2                        | 6           |
| Antonucci, 2014 [54]        | 4                 | 2                     | 2                        | 8           |
| El-Hadidi, 2014 [53]        | 3                 | 2                     | 2                        | 7           |
| Holzer, 2014 [56]           | 1                 | 1                     | 2                        | 4           |
| Nakhwa, 2014 [38]           | 2                 | 2                     | 2                        | 6           |
| Bilgiç, 2015 [23]           | 2                 | 1                     | 2                        | 5           |
| Farshchian, 2015 [35]       | 4                 | 1                     | 2                        | 7           |
| Irimie, 2015 [1]            | 3                 | 2                     | 2                        | 7           |
| Naik, 2015 [49]             | 3                 | 2                     | 2                        | 7           |
| Pang, 2015 [59]             | 3                 | 1                     | 2                        | 6           |
| Prathibha, 2015 [39]        | 3                 | 1                     | 2                        | 6           |
| Sunitha, 2015 [40]          | 3                 | 2                     | 2                        | 7           |
| Alatas, 2017 [24]           | 2                 | 2                     | 2                        | 6           |
| Coban, 2016 [25]            | 3                 | 2                     | 2                        | 7           |

| The first author, year  | Selection (score) | Comparability (score) | Exposure/outcome (score) | Total score |
|-------------------------|-------------------|-----------------------|--------------------------|-------------|
| Okan, 2016 [26]         | 3                 | 2                     | 2                        | 7           |
| Praveenkumar, 2016 [41] | 3                 | 2                     | 2                        | 7           |
| Uczniak, 2016 [46]      | 2                 | 2                     | 2                        | 6           |
| Girisha, 2017 [42]      | 3                 | 2                     | 2                        | 7           |
| Myśliwiec, 2017 [5]     | 3                 | 2                     | 2                        | 7           |
| Sereflican, 2017 [27]   | 3                 | 2                     | 2                        | 7           |
| Solak, 2017 [28]        | 3                 | 2                     | 2                        | 7           |
| Mean score              |                   |                       |                          | 6.1         |

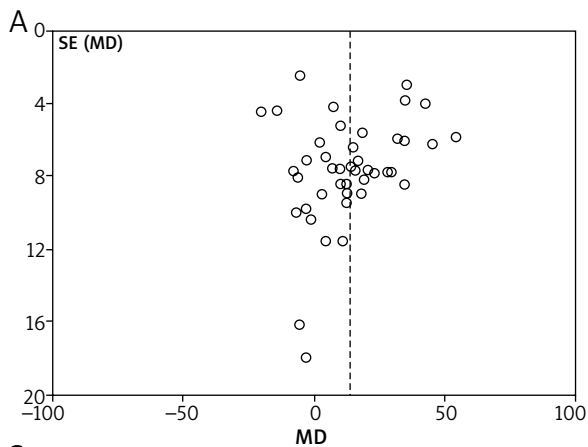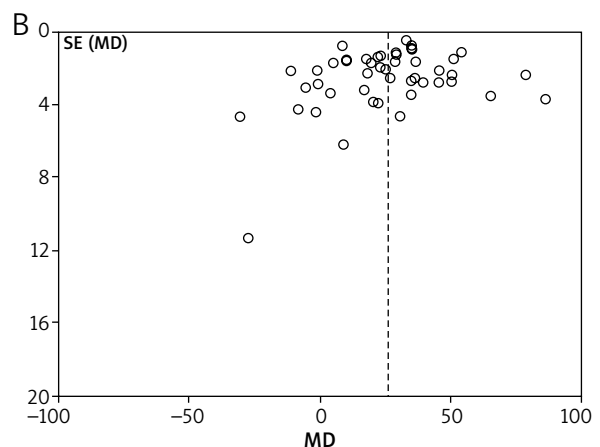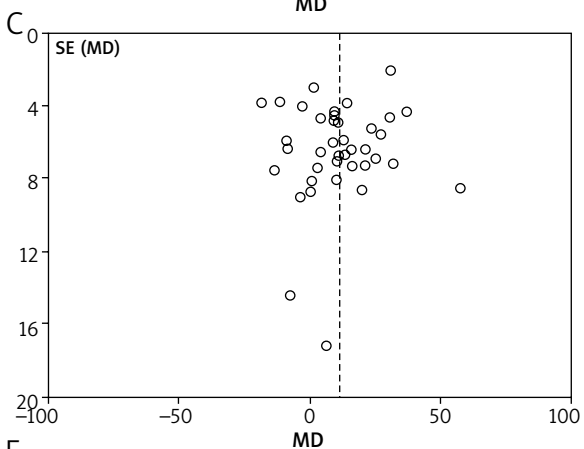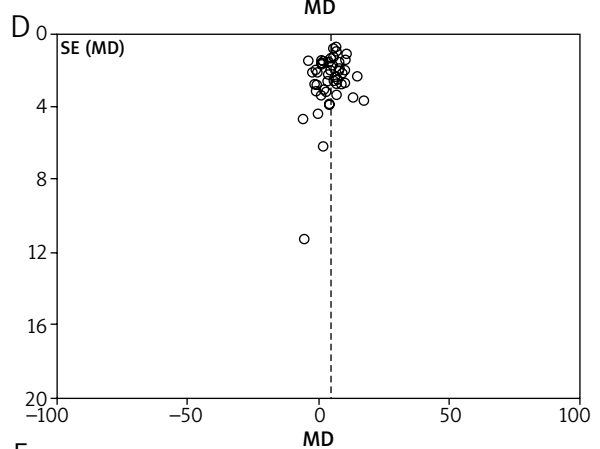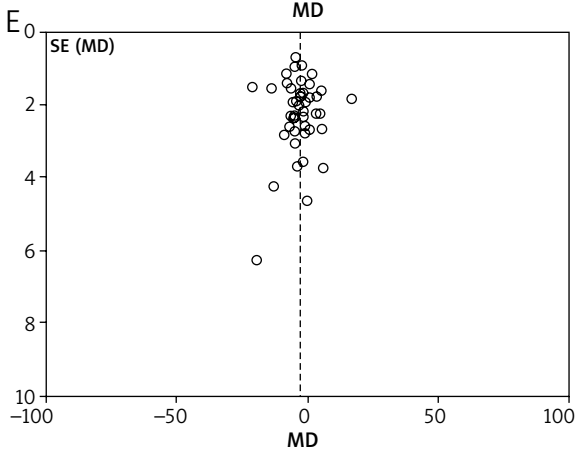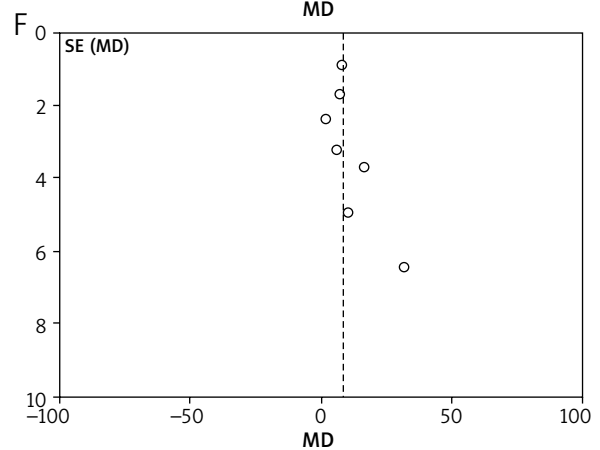

Supplement: PDIA-36-91420-s003.pdf [file PDIA-36-91420-s003.pdf]
