# Supplementary material for: Evaluation of serum lipid, lipoprotein, and apolipoprotein levels in psoriatic patients: a systematic review and meta-analysis of case-control studies
Source: PubMed Central journal article supplement — Postepy Dermatol Alergol. 2019 Dec 30;36(6):692–702. doi: 10.5114/ada.2019.91420 (PMC6986295; doi:10.5114/ada.2019.91420), 2019-12-30
Supplement: PDIA-36-91420-s001.pdf [file PDIA-36-91420-s001.pdf]

**Supplementary Table S1.** Baseline characteristics of the studies included in meta-analysis (*n* = 49)

| The first author, year      | Country  | Number of patients | Number of controls | Mean age of patients [years] | Mean age of controls [years] | % of male patients | % of male controls | Mean BMI of patients [kg/m <sup>2</sup> ] | Mean BMI of controls [kg/m <sup>2</sup> ] | Mean PASI score of patients                 |
|-----------------------------|----------|--------------------|--------------------|------------------------------|------------------------------|--------------------|--------------------|-------------------------------------------|-------------------------------------------|---------------------------------------------|
| Aguilar Martinez, 1989 [10] | Spain    | 61                 | 34                 | 47.8                         | 44                           | 54.1               | 44.1               | –                                         | –                                         | –                                           |
| Seckin, 1994 [16]           | Turkey   | 32                 | 13                 | 35.53                        | 35.69                        | 100                | 100                | Matched                                   | Matched                                   | Range (1–64.2)                              |
| Seishima, 1994 [50]         | Japan    | 38                 | 40                 | 46.2                         | 45.7                         | 100                | 100                | –                                         | –                                         | > 30                                        |
| Rocha-Pereira, 2001 [57]    | Portugal | 48                 | 40                 | 47                           | 47                           | 62                 | 55                 | Matched                                   | Matched                                   | Mild and severe                             |
| Takeda, 2001 [51]           | Japan    | 27                 | 15                 | 43.6                         | 35.2                         | 74.1               | 66.7               | –                                         | –                                         | 11.2                                        |
| Pietrzak, 2002 [43]         | Poland   | 41                 | 57                 | 27.43                        | 26.32                        | 63.4               | 50.87              | 23.99                                     | 26.7                                      | 27.6                                        |
| Uyanik, 2002 [17]           | Turkey   | 72                 | 30                 | 38.4                         | Matched                      | 40.3               | –                  | ≤ 28                                      | ≤ 28                                      | –                                           |
| Piskin, 2003 [18]           | Turkey   | 100                | 100                | 45.1                         | 44                           | 48                 | 54                 | –                                         | –                                         | –                                           |
| Vanizor Kural, 2003 [19]    | Turkey   | 30                 | 30                 | 34.2                         | 36.7                         | 43.3               | 50                 | –                                         | –                                         | 5.52                                        |
| Pietrzak, 2006 [44]         | Poland   | 22                 | 12                 | 32.27                        | 28.58                        | 100                | 100                | 23.66                                     | 24.1                                      | 27.02                                       |
| Farshchian, 2007 [29]       | Iran     | 30                 | 30                 | 34.6                         | 34.63                        | 60                 | 60                 | 22.96                                     | 23.23                                     | 9.99                                        |
| Akhyani, 2007 [30]          | Iran     | 50                 | 50                 | 41.82                        | 43.34                        | 78                 | 78                 | 25.56                                     | 25.20                                     | –                                           |
| Bajaj, 2009 [36]            | India    | 79                 | 79                 | 37                           | 37                           | 55.7               | 55.7               | ≤ 30                                      | ≤ 30                                      | –                                           |
| Pietrzak, 2009 [45]         | Poland   | 34                 | 26                 | 37.03                        | 34.11                        | 100                | 100                | 25.52                                     | 25.04                                     | 27.02                                       |
| Toker, 2009 [20]            | Turkey   | 30                 | 23                 | 30.4                         | 29.5                         | 40                 | 47.9               | 23.27                                     | 24.12                                     | –                                           |
| Aldhalimi, 2010 [58]        | Iraq     | 50                 | 50                 | 37.6                         | 37.4                         | 78                 | 78                 | Matched (≤ 30)                            | Matched (≤ 30)                            | 19.6                                        |
| Azizzadeh, 2010 [31]        | Iran     | 52                 | 50                 | 35.86                        | 33                           | 55.8               | 46                 | Matched (≤ 30)                            | Matched (≤ 30)                            | < 5 (13.5%)<br>5–15 (65.4%)<br>> 15 (21.2%) |
| Swelam, 2010 [52]           | Egypt    | 30                 | 10                 | 35.3                         | 37.7                         | 36.7               | 20                 | –                                         | –                                         | Mild to moderate                            |
| Malekzad, 2011 [32]         | Iran     | 30                 | 30                 | 37.27                        | 36.1                         | 43.3               | 46.67              | 31.37                                     | 30.30                                     | –                                           |
| Pereira, 2011 [37]          | India    | 77                 | 92                 | 46.51                        | 43.24                        | 80.5               | 68.5               | –                                         | –                                         | 4.61                                        |
| Usta, 2011 [21]             | Turkey   | 52                 | 25                 | 37.44                        | 35                           | 44.2               | 40                 | 28.65                                     | 24.3                                      | 3.65                                        |
| Asefi, 2012 [33]            | Iran     | 100                | 100                | 35.3                         | 35.7                         | 43                 | 44                 | ≤ 30                                      | ≤ 30                                      | 16.7                                        |
| Ferretti, 2012 [55]         | Italy    | 23                 | 25                 | 47.5                         | 40.6                         | 43.5               | 48                 | –                                         | –                                         | < 20 (52.2%)<br>≥ 20 (47.8%)                |
| Mehta, 2012 [47]            | USA      | 122                | 134                | 44.5                         | 49                           | 60                 | 53                 | 29.5                                      | 26.9                                      | 3.83                                        |
| Romani, 2012 [2]            | Spain    | 50                 | 40                 | 46.4                         | 46.1                         | 62                 | 77.5               | 27.6                                      | 27.5                                      | 15.6                                        |
| Cao, 2013 [48]              | USA      | 100                | 53                 | 46.3                         | 45.1                         | 52                 | 49.1               | 30.1                                      | 29.1                                      | 8.0                                         |
| Emre, 2013 [22]             | Turkey   | 28                 | 46                 | 39.89                        | 35.11                        | 42.9               | 43.5               | –                                         | –                                         | 11.09                                       |
| Nemati, 2013 [11]           | Iran     | 90                 | 90                 | 34.7                         | 33                           | Matched            | Matched            | 25.5                                      | 25.3                                      | < 50                                        |
| Taheri Sarvtin, 2014 [34]   | Iran     | 50                 | 50                 | 43.84                        | 44.9                         | 46                 | 46                 | 24.4                                      | 23.88                                     | < 10 (74%)<br>10–20 (14%)<br>> 20 (12%)     |
| Antonucci, 2014 [54]        | Italy    | 40                 | 40                 | 48.08                        | 49.48                        | 65                 | 65                 | 23.98                                     | 24.45                                     | 16.1                                        |
| El-Hadidi, 2014 [53]        | Egypt    | 30                 | 30                 | 48.4                         | 48.07                        | 53.3               | 53.3               | 31.72                                     | 25.2                                      | 15.03                                       |
| Holzer, 2014 [56]           | Austria  | 15                 | 15                 | 49.7                         | 43                           | 80                 | 67                 | –                                         | –                                         | 16.6                                        |

| The first author, year  | Country | Number of patients | Number of controls | Mean age of patients [years] | Mean age of controls [years] | % of male patients | % of male controls | Mean BMI of patients [kg/m <sup>2</sup> ] | Mean BMI of controls [kg/m <sup>2</sup> ] | Mean PASI score of patients                           |
|-------------------------|---------|--------------------|--------------------|------------------------------|------------------------------|--------------------|--------------------|-------------------------------------------|-------------------------------------------|-------------------------------------------------------|
| Nakhwa, 2014 [38]       | India   | 100                | 73                 | 40.72                        | 41.67                        | 75                 | 75.3               | –                                         | –                                         | 6.9 (median)                                          |
| Bilgiç, 2015 [23]       | Turkey  | 40                 | 40                 | 26.03                        | 23.4                         | 100                | 100                | Matched                                   | Matched                                   | 5.32                                                  |
| Farshchian, 2015 [35]   | Iran    | 55                 | 55                 | 47.3                         | 45.16                        | 65.5               | 64                 | 26.36                                     | 24.60                                     | –                                                     |
| Irimie, 2015 [1]        | Romania | 142                | 167                | 49.51                        | 47.87                        | 52.8               | 52.7               | ≥ 30 (28.87%)                             | ≥ 30 (23.35%)                             | 8.63                                                  |
| Naik, 2015 [49]         | USA     | 60                 | 20                 | 46.75                        | 40.37                        | 47                 | 65                 | 29.4                                      | 27.4                                      | 5.48                                                  |
| Pang, 2015 [59]         | China   | 86                 | 84                 | 38.53                        | 41.33                        | 74.42              | 83.33              | 24.82                                     | 23.87                                     | < 12 (12.8%)<br>≥ 12 and < 30 (62.8%)<br>≥ 30 (24.4%) |
| Prathibha, 2015 [39]    | India   | 30                 | 30                 | Matched                      | Matched                      | 66.7               | 53.3               | –                                         | –                                         | –                                                     |
| Sunitha, 2015 [40]      | India   | 45                 | 45                 | 44.87                        | 42.56                        | 80                 | 80                 | 22.88                                     | 22.96                                     | 13.97                                                 |
| Alatas, 2017 [24]       | Turkey  | 30                 | 30                 | 39.67                        | 39.76                        | 50                 | 50                 | 27.73                                     | 26.17                                     | 4.71                                                  |
| Coban, 2016 [25]        | Turkey  | 35                 | 50                 | 44.43                        | 40.48                        | 71.4               | 64                 | 27.18                                     | 26.88                                     | 5.85                                                  |
| Okan, 2016 [26]         | Turkey  | 45                 | 45                 | 33.3                         | 36.3                         | 68.9               | 64.4               | 26.1                                      | 26.9                                      | 18.5                                                  |
| Praveenkumar, 2016 [41] | India   | 30                 | 30                 | 42.07                        | 45.77                        | 46.7               | 50                 | 24.23                                     | 24.56                                     | –                                                     |
| Uczniak, 2016 [46]      | Poland  | 246                | 75                 | 46                           | 46                           | 56.1               | 46.7               | –                                         | –                                         | Moderate to severe                                    |
| Girisha, 2017 [42]      | India   | 156                | 156                | 45.5                         | 45.4                         | 75.6               | 75.6               | 24                                        | 25.2                                      | 5.77                                                  |
| Myśliwiec, 2017 [5]     | Poland  | 85                 | 32                 | 49.7                         | 43.8                         | 67                 | 65                 | 27.55                                     | 23.97                                     | 11.4                                                  |
| Sereflican, 2017 [27]   | Turkey  | 32                 | 22                 | 32.25                        | 26                           | 37.5               | 13.6               | 25.25                                     | 21.25                                     | 4.4                                                   |
| Solak, 2017 [28]        | Turkey  | 70                 | 60                 | 45.0                         | 43.4                         | 47.1               | 48.3               | 28.1                                      | 25.8                                      | 6.83                                                  |
| Total                   | –       | 2600               | 2358               | 40.89                        | 39.64                        | 68.93              | 63.81              | –                                         | –                                         | –                                                     |

BMI – body mass index, PASI – psoriasis area and severity index.

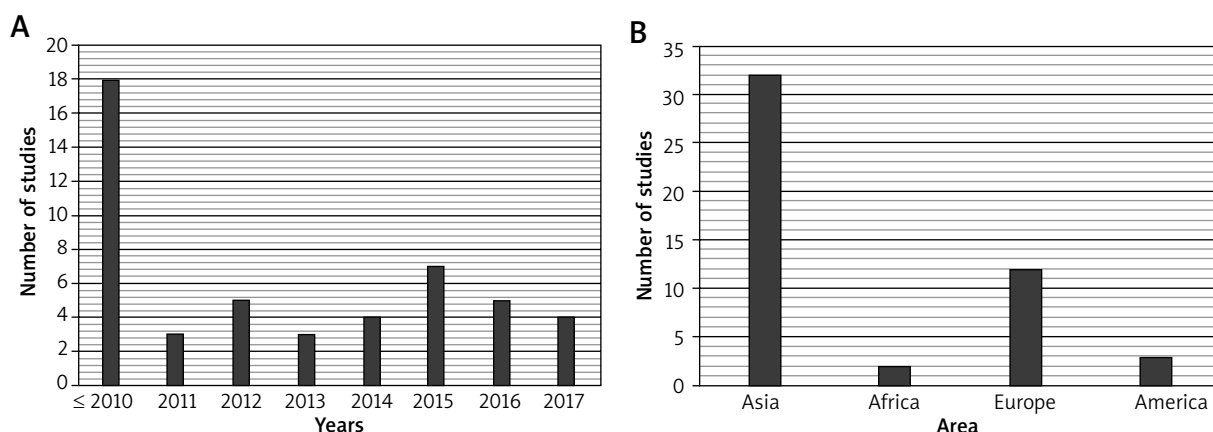

**Supplementary Figure S1. A** – Number of studies published per year of publication. **B** – Number of studies published per geographic area
