# Supplementary material for: Evaluation of serum lipid, lipoprotein, and apolipoprotein levels in psoriatic patients: a systematic review and meta-analysis of case-control studies
Source: PubMed Central journal article supplement — Postepy Dermatol Alergol. 2019 Dec 30;36(6):692–702. doi: 10.5114/ada.2019.91420 (PMC6986295; doi:10.5114/ada.2019.91420), 2019-12-30
Supplement: PDIA-36-91420-s002.pdf [file PDIA-36-91420-s002.pdf]

| The first author, year  | Country | Number of patients | Number of controls | Mean age of patients [years] | Mean age of controls [years] | % of male patients | % of male controls | Mean BMI of patients [kg/m <sup>2</sup> ] | Mean BMI of controls [kg/m <sup>2</sup> ] | Mean PASI score of patients                           |
|-------------------------|---------|--------------------|--------------------|------------------------------|------------------------------|--------------------|--------------------|-------------------------------------------|-------------------------------------------|-------------------------------------------------------|
| Nakhwa, 2014 [38]       | India   | 100                | 73                 | 40.72                        | 41.67                        | 75                 | 75.3               | –                                         | –                                         | 6.9 (median)                                          |
| Bilgiç, 2015 [23]       | Turkey  | 40                 | 40                 | 26.03                        | 23.4                         | 100                | 100                | Matched                                   | Matched                                   | 5.32                                                  |
| Farshchian, 2015 [35]   | Iran    | 55                 | 55                 | 47.3                         | 45.16                        | 65.5               | 64                 | 26.36                                     | 24.60                                     | –                                                     |
| Irimie, 2015 [1]        | Romania | 142                | 167                | 49.51                        | 47.87                        | 52.8               | 52.7               | ≥ 30 (28.87%)                             | ≥ 30 (23.35%)                             | 8.63                                                  |
| Naik, 2015 [49]         | USA     | 60                 | 20                 | 46.75                        | 40.37                        | 47                 | 65                 | 29.4                                      | 27.4                                      | 5.48                                                  |
| Pang, 2015 [59]         | China   | 86                 | 84                 | 38.53                        | 41.33                        | 74.42              | 83.33              | 24.82                                     | 23.87                                     | < 12 (12.8%)<br>≥ 12 and < 30 (62.8%)<br>≥ 30 (24.4%) |
| Prathibha, 2015 [39]    | India   | 30                 | 30                 | Matched                      | Matched                      | 66.7               | 53.3               | –                                         | –                                         | –                                                     |
| Sunitha, 2015 [40]      | India   | 45                 | 45                 | 44.87                        | 42.56                        | 80                 | 80                 | 22.88                                     | 22.96                                     | 13.97                                                 |
| Alatas, 2017 [24]       | Turkey  | 30                 | 30                 | 39.67                        | 39.76                        | 50                 | 50                 | 27.73                                     | 26.17                                     | 4.71                                                  |
| Coban, 2016 [25]        | Turkey  | 35                 | 50                 | 44.43                        | 40.48                        | 71.4               | 64                 | 27.18                                     | 26.88                                     | 5.85                                                  |
| Okan, 2016 [26]         | Turkey  | 45                 | 45                 | 33.3                         | 36.3                         | 68.9               | 64.4               | 26.1                                      | 26.9                                      | 18.5                                                  |
| Praveenkumar, 2016 [41] | India   | 30                 | 30                 | 42.07                        | 45.77                        | 46.7               | 50                 | 24.23                                     | 24.56                                     | –                                                     |
| Uczniak, 2016 [46]      | Poland  | 246                | 75                 | 46                           | 46                           | 56.1               | 46.7               | –                                         | –                                         | Moderate to severe                                    |
| Girisha, 2017 [42]      | India   | 156                | 156                | 45.5                         | 45.4                         | 75.6               | 75.6               | 24                                        | 25.2                                      | 5.77                                                  |
| Myśliwiec, 2017 [5]     | Poland  | 85                 | 32                 | 49.7                         | 43.8                         | 67                 | 65                 | 27.55                                     | 23.97                                     | 11.4                                                  |
| Sereflican, 2017 [27]   | Turkey  | 32                 | 22                 | 32.25                        | 26                           | 37.5               | 13.6               | 25.25                                     | 21.25                                     | 4.4                                                   |
| Solak, 2017 [28]        | Turkey  | 70                 | 60                 | 45.0                         | 43.4                         | 47.1               | 48.3               | 28.1                                      | 25.8                                      | 6.83                                                  |
| Total                   | –       | 2600               | 2358               | 40.89                        | 39.64                        | 68.93              | 63.81              | –                                         | –                                         | –                                                     |

BMI – body mass index, PASI – psoriasis area and severity index.

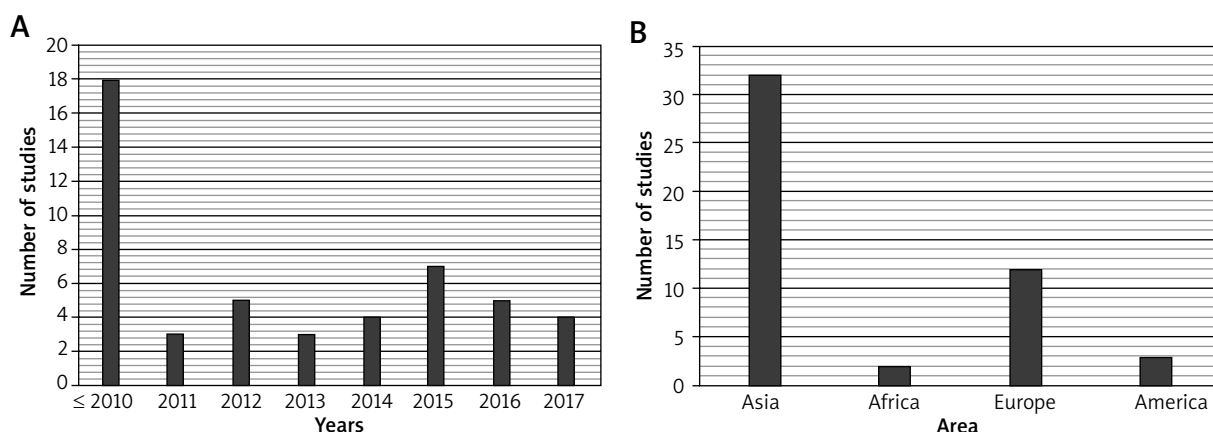

**Supplementary Figure S1. A** – Number of studies published per year of publication. **B** – Number of studies published per geographic area
