# Supplementary material for: Evaluation of serum lipid, lipoprotein, and apolipoprotein levels in psoriatic patients: a systematic review and meta-analysis of case-control studies
Source: PubMed Central journal article supplement — Postepy Dermatol Alergol. 2019 Dec 30;36(6):692–702. doi: 10.5114/ada.2019.91420 (PMC6986295; doi:10.5114/ada.2019.91420), 2019-12-30
Supplement: PDIA-36-91420-s004.pdf [file PDIA-36-91420-s004.pdf]

| The first author, year  | Selection (score) | Comparability (score) | Exposure/outcome (score) | Total score |
|-------------------------|-------------------|-----------------------|--------------------------|-------------|
| Okan, 2016 [26]         | 3                 | 2                     | 2                        | 7           |
| Praveenkumar, 2016 [41] | 3                 | 2                     | 2                        | 7           |
| Uczniak, 2016 [46]      | 2                 | 2                     | 2                        | 6           |
| Girisha, 2017 [42]      | 3                 | 2                     | 2                        | 7           |
| Myśliwiec, 2017 [5]     | 3                 | 2                     | 2                        | 7           |
| Sereflican, 2017 [27]   | 3                 | 2                     | 2                        | 7           |
| Solak, 2017 [28]        | 3                 | 2                     | 2                        | 7           |
| Mean score              |                   |                       |                          | 6.1         |

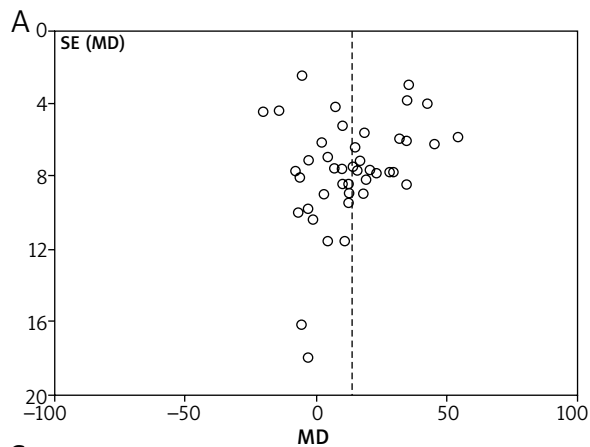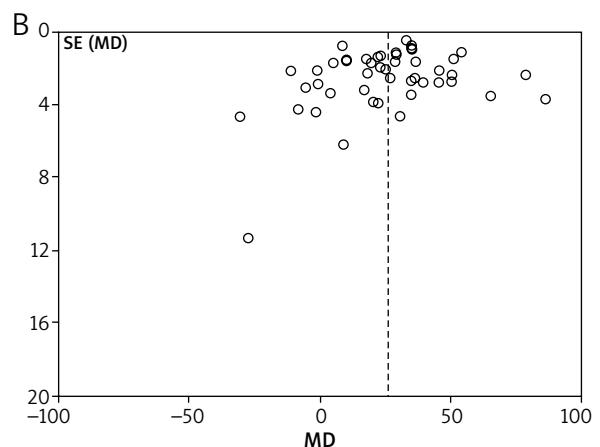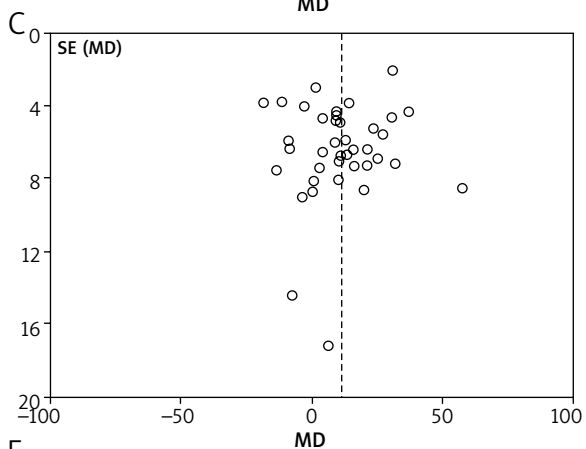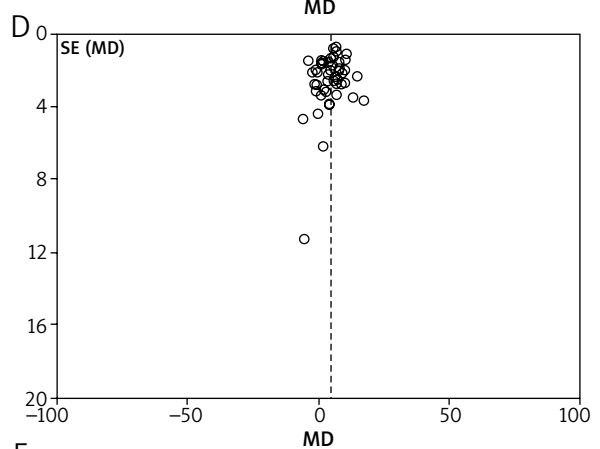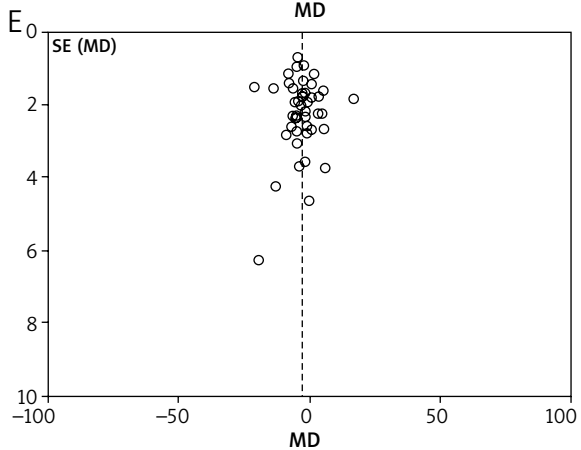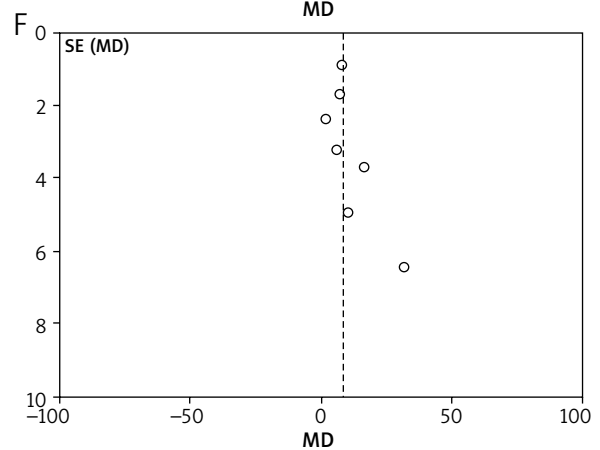

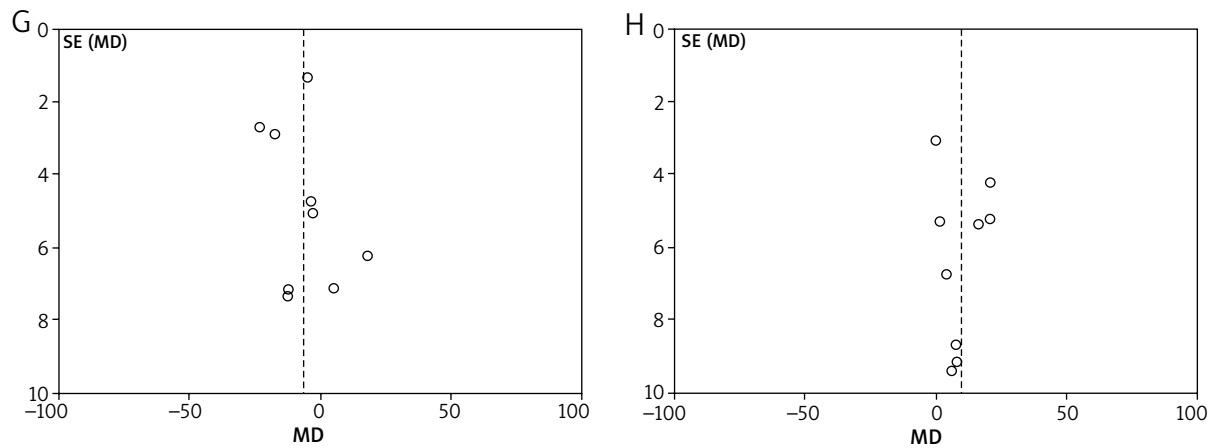

**Supplementary Figure S2.** Funnel plot of random-effects analysis of total cholesterol (A), triglyceride (B), low-density lipoprotein (C), very low-density lipoprotein (D), high-density lipoprotein (E), lipoprotein (a) (F), apolipoprotein A1 (G), and apolipoprotein B (H) levels in psoriatic patients compared with healthy controls
